# Supplementary material for: Unraveling the high-activity nature of Fe–N–C electrocatalysts for the oxygen reduction reaction: the extraordinary synergy between Fe–N4 and Fe4N
Source: Royal Society of Chemistry journal article supplement (doi:10.1039/c9ta02338k), 2019-01-01
Supplement: c9ta02338k1.pdf [file c9ta02338k1.pdf]

## Supporting Information

### Unraveling the high-activity nature of Fe-N-C electrocatalysts for oxygen reduction reaction: the extraordinary synergy between Fe-N<sub>4</sub> and Fe<sub>4</sub>N

#### Table of contents

1. Material Synthesis
2. Theoretical Section
3. Supporting Figures and Tables
4. References

#### 1. Material Synthesis

##### Principle and tactics

First, NaCl crystals with a face-centered cubic (FCC) structure were synthesized, and serve as templates for preparation of the 3D porous carbon networks, inhibiting the agglomeration of Fe-based nanoparticles. Second, D(+)-glucosamine hydrochloride (C<sub>6</sub>H<sub>13</sub>NO<sub>5</sub>•HCl) was chosen as the precursor since it can be homogeneously distributed in FeCl<sub>3</sub> solution due to the strong interactions between the functional groups of C<sub>6</sub>H<sub>13</sub>NO<sub>5</sub>•HCl and ferric ion. Third, dicyandiamide (C<sub>2</sub>H<sub>4</sub>N<sub>4</sub>) was further added into the solution under stirring. During the further pyrolysis process, C<sub>2</sub>H<sub>4</sub>N<sub>4</sub> gradually decomposed with simultaneous release of a large amount of carbon nitrogen species (e.g. C<sub>2</sub>N<sub>2</sub><sup>+</sup>, C<sub>3</sub>N<sub>2</sub><sup>+</sup>, C<sub>3</sub>N<sub>3</sub><sup>+</sup>).<sup>1</sup> By reacting with C<sub>6</sub>H<sub>13</sub>NO<sub>5</sub>•HCl and its further evolvement, 3D N-doped interconnected carbon networks was formed. Finally, the NaCl templates was removed.

#### 2. Theoretical Section

##### Reaction mechanism

To understand the nature of the high oxygen reduction reaction (ORR) activity of Fe<sub>4</sub>N

supported Fe-N<sub>4</sub> systems, we further performed density functional theory (DFT) calculations to investigate the free energetics of the ORR reaction mechanism. The pathways on Fe<sub>4</sub>N supported Fe-N<sub>4</sub> systems were calculated in detail according to electrochemical framework developed by Nørskov and co-workers.<sup>2</sup> For the ORR in an alkaline electrolyte (pH=13), as H<sub>2</sub>O/H<sub>3</sub>O<sup>+</sup> may act as the proton donor, the overall reaction scheme of the ORR can be expressed as:

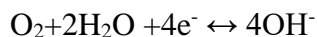

The ORR can proceed through the following elementary steps usually employed to investigate the electrocatalysis of the ORR on various materials:

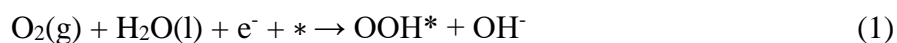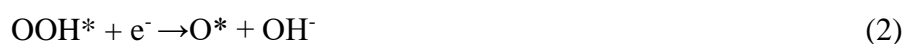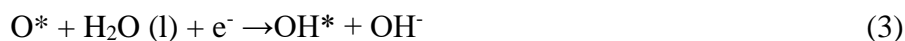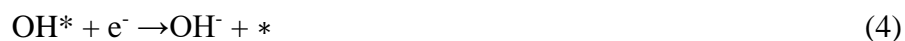

where \* stands for an active site on the catalytic surface, (l) and (g) refer to liquid and gas phases, respectively.

### Structure optimization and adsorption

For comparison, the catalytic activity of free Fe-N<sub>4</sub> moieties, bare Fe<sub>4</sub>N and Fe<sub>4</sub>N supported Fe-N<sub>4</sub> moieties were all investigated. In Fe<sub>4</sub>N crystals, the exposed surface are either Fe or N atom. Considering all the possible atoms configuration in real catalyst, four models of Fe<sub>4</sub>N were drafted: Fe<sub>4</sub>N(001)-Fe, Fe<sub>4</sub>N(001)-N; Fe<sub>4</sub>N(111)-Fe; Fe<sub>4</sub>N(111)-FeN (Fig. S12). Moreover, for the Fe<sub>4</sub>N supported Fe-N<sub>4</sub> moieties case, four possible structures were considered and built: Fe<sub>4</sub>N(001)-FeN supported Fe-N<sub>4</sub>; Fe<sub>4</sub>N(001)-Fe supported Fe-N<sub>4</sub>; Fe<sub>4</sub>N(111)-Fe supported Fe-N<sub>4</sub>; Fe<sub>4</sub>N(111)-FeN supported Fe-N<sub>4</sub> (Fig. S13). In order to demonstrate the stability and synergistic effect of these catalysts models, we calculated the interaction energy between the Fe<sub>4</sub>N and Fe or FeN. The interaction energies between Fe<sub>4</sub>N and Fe or FeN are -1.78 eV, 1.37 eV, 3.94 eV and 3.13 eV for Fe<sub>4</sub>N(001)-Fe, Fe<sub>4</sub>N(001)-N; Fe<sub>4</sub>N(111)-Fe; Fe<sub>4</sub>N(111)-FeN, respectively. So, all the Fe<sub>4</sub>N supported structures are stable. To demonstrate the stability and synergistic effect of these catalysts models, we calculated the interaction

energy between the Fe<sub>4</sub>N and Fe or FeN. The interaction energies between Fe<sub>4</sub>N and Fe or FeN are -1.78 eV, 1.37 eV, 3.94 eV and 3.13 eV for Fe<sub>4</sub>N(001)-Fe, Fe<sub>4</sub>N(001)-N; Fe<sub>4</sub>N(111)-Fe; Fe<sub>4</sub>N(111)-FeN, respectively. Thus, all the Fe<sub>4</sub>N supported structures are stable. The free Fe-N<sub>4</sub> model can be seen in Fig. S14.

To examine the catalytic activity, we calculated the adsorption energies of O<sub>2</sub>, O, OH, and OOH. Fig. S15 shows the adsorption structures of O<sub>2</sub>, O, OH, and OOH on supported- or free Fe-N<sub>4</sub> moieties, the detail calculated free energy values of which could refer to Table S4.

### Reaction free energy calculation

For proton-transfer steps, reaction free energies are generally regarded as the activation barriers. Since the transfer of a solvated proton to adsorbed OH<sup>-</sup> show a negligible overbarrier, it suggests that the proton transfer is downhill in energy.<sup>3</sup> This approximation may result in slight overestimation of activity for a given proton-transfer elementary step, but can still qualitatively represent the relative energetic ordering of the various proton-transfer elementary steps. Thus, we use reactions (1)-(4) to derive the thermochemistry for ORR.

The chemical potential of each adsorbate is defined as:

$$\mu = E + E_{ZPE} - T \times S$$

where the  $E$  is the total energy obtained from DFT calculations,  $E_{ZPE}$  is zero-point energy and  $S$  is the entropy at 298 K. To obtain the reaction free energy of each elementary step of the ORR, we calculated the adsorption free energy of O<sup>\*</sup>, OH<sup>\*</sup>, and OOH<sup>\*</sup>. Since it is difficult to obtain the exact free energy of OOH, O, and OH radicals in the electrolyte solution, the adsorption free energy  $\Delta G_{O^*}$ ,  $\Delta G_{OH^*}$ , and  $\Delta G_{OOH^*}$ , are relative to the free energy of appropriate stoichiometric amounts of H<sub>2</sub>O (g) and H<sub>2</sub> (g), defined as follows:

$$\begin{aligned} (1) \quad \Delta G_{O^*} &= \Delta G(H_2O(g) + ^* \rightarrow O^* + H_2(g)) = \mu_{O^*} + \mu_{H_2} - \mu_{H_2O} - \mu^* \\ &= (E_{O^*} + E_{H_2} - E_{H_2O} - E_*) + (E_{ZPE(O^*)} + E_{ZPE(H_2)} - E_{ZPE(H_2O)} - E_{ZPE(^*)}) - T \times (S_{O^*} + S_{H_2} \\ &\quad - S_{H_2O} - S_*) \end{aligned}$$

$$\begin{aligned}
(2) \Delta G_{OH^*} &= \Delta G(H_2O(g) + ^* \rightarrow OH^* + 1/2 H_2(g)) = \mu_{OH^*} + 1/2 \mu_{H_2} - \mu_{H_2O} - \mu^* \\
&= (E_{OH^*} + 1/2 E_{H_2} - E_{H_2O} - E_*) + (E_{ZPE(OH^*)} + 1/2 E_{ZPE(H_2)} - E_{ZPE(H_2O)} - E_{ZPE(^*)}) \\
&\quad - T \times (S_{OH^*} + 1/2 S_{H_2} - S_{H_2O} - S_*) \\
(3) \Delta G_{OOH^*} &= \Delta G(2H_2O(g) + ^* \rightarrow OOH^* + 3/2 H_2(g)) = \mu_{OOH^*} + 3/2 \mu_{H_2} - 2\mu_{H_2O} - \mu^* \\
&= (E_{OOH^*} + 3/2 E_{H_2} - 2E_{H_2O} - E_*) + (E_{ZPE(OOH^*)} + 3/2 E_{ZPE(H_2)} - 2E_{ZPE(H_2O)} - E_{ZPE(^*)}) \\
&\quad - T \times (S_{OOH^*} + 3/2 S_{H_2} - 2S_{H_2O} - S_*)
\end{aligned}$$

Here, the asterisk (\*) indicates an adsorption site. Entropy values of gaseous molecules are taken from the standard tables in the Physical Chemistry text book,<sup>4</sup> while the entropies of adsorbate and adsorption site are negligible. The zero-point energy for each adsorbate and free molecules can be obtained from the vibration frequency calculation, while the zero-point energy of adsorption site is negligible. All the  $E_{ZPE}$  and  $S$  results are summarized in Table S5.

For each elementary step, the Gibbs reaction free energy  $\Delta G$  is defined as the difference between free energies of the initial and final states, and is given by the following expression:

$$\Delta G = \Delta E + \Delta ZPE - T\Delta S + \Delta G_U + \Delta G_{pH}$$

where  $\Delta E$  is the reaction energy of reactant and product molecules adsorbed on catalyst surface, obtained from DFT calculations;  $\Delta ZPE$  and  $\Delta S$  are the change in zero point energies and entropy during the reaction. The bias effect on the free energy of each initial, intermediate and final state involving electrons transfer in the electrode is also taken into account by shifting the energy of the state by  $\Delta G_U = -neU$ , where  $U$  is the electrode applied potential,  $e$  is the transferred charge and  $n$  is the number of proton–electron transferred pairs. The change of free energy owing to the effect of pH value of the electrolyte is considered by the correction of  $H^+$  ions concentration ( $[H^+]$ ) dependence of the entropy,  $\Delta G_{pH} = -k_B T \ln[H^+] = pH \times k_B T \ln 10$ , where  $k_B$  is the Boltzmann constant and  $T$  is the temperature. Given the fact that the high-spin ground state of the oxygen molecule is poorly described in DFT calculations, the free energy of the  $O_2$  molecule was determined by  $G_{O_2}(g) = 2G_{H_2O}(l) - 2G_{H_2} + 4 \times 1.23(eV)$ . The free energy of  $OH^-$  was derived as  $G_{OH^-} = G_{H_2O}(l) - 2G_{H^+}$ . The

free energy for gas phased water was calculated at 0.035 bars because this is the equilibrium pressure in contact with liquid water at 298 K. The free energy of gas phase water at these conditions is equal to the free energy of liquid water.

The reaction free energy of (1)-(4) for the ORR can be determined from the following equations:

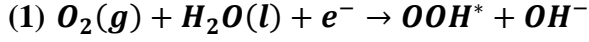

$$\begin{aligned} \Delta G_1 &= \mu_{\text{OOH}^*} + \mu_{\text{OH}^-} - \mu_{\text{H}_2\text{O}} - \mu_* - \mu_{\text{O}_2} - \mu_{e^-} \\ &= \mu_{\text{OOH}^*} + (\mu_{\text{H}_2\text{O}} - \mu_{\text{H}^+}) - \mu_{\text{H}_2\text{O}} - \mu_* - (2\mu_{\text{H}_2\text{O}} - 2\mu_{\text{H}_2} + 4 \times 1.23) - \mu_{e^-} \\ &= \mu_{\text{OOH}^*} + 3/2 \times \mu_{\text{OOH}^*} - 2\mu_{\text{H}_2\text{O}} - \mu_* - 4.92 \\ &= \Delta G_{\text{OOH}^*} - 4.92 \end{aligned}$$

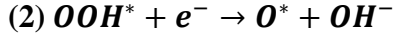

$$\begin{aligned} \Delta G_2 &= \mu_{\text{O}^*} + \mu_{\text{OH}^-} - \mu_{\text{OOH}^*} - \mu_{e^-} \\ &= \mu_{\text{O}^*} + (\mu_{\text{H}_2\text{O}} - \mu_{\text{H}^+}) - \mu_{\text{OOH}^*} - \mu_{e^-} \\ &= \mu_{\text{O}^*} + \mu_{\text{H}_2\text{O}} - 1/2 \mu_{\text{H}_2} - \mu_{\text{OOH}^*} \\ &= (\mu_{\text{O}^*} + \mu_{\text{H}_2} - \mu_{\text{H}_2\text{O}} - \mu_*) - (\mu_{\text{OOH}^*} + 3/2 \mu_{\text{H}_2} - 2\mu_{\text{H}_2\text{O}} - \mu_*) \\ &= \Delta G_{\text{O}^*} - \Delta G_{\text{OOH}^*} \end{aligned}$$

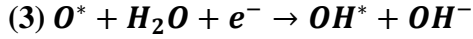

$$\begin{aligned} \Delta G_3 &= \mu_{\text{OH}^*} + \mu_{\text{OH}^-} - \mu_{\text{O}^*} - \mu_{\text{H}_2\text{O}} - \mu_{e^-} \\ &= \mu_{\text{OH}^*} + (\mu_{\text{H}_2\text{O}} - \mu_{\text{H}^+}) - \mu_{\text{O}^*} - \mu_{\text{H}_2\text{O}} - \mu_{e^-} \\ &= \mu_{\text{OH}^*} - 1/2 \mu_{\text{H}_2} - \mu_{\text{O}^*} \\ &= (\mu_{\text{OH}^*} + 1/2 \mu_{\text{H}_2} - \mu_{\text{H}_2\text{O}} - \mu_*) - (\mu_{\text{O}^*} + \mu_{\text{H}_2} - \mu_{\text{H}_2\text{O}} - \mu_*) \\ &= \Delta G_{\text{OH}^*} - \Delta G_{\text{O}^*} \end{aligned}$$

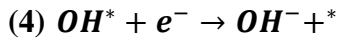

$$\begin{aligned} \Delta G_4 &= \mu_{\text{OH}^-} + \mu^* - \mu_{\text{OH}^*} - \mu_{e^-} \\ &= (\mu_{\text{H}_2\text{O}} - \mu_{\text{H}^+}) + \mu^* - \mu_{\text{OH}^*} - \mu_{e^-} \\ &= \mu_{\text{H}_2\text{O}} - 1/2 \mu_{\text{H}_2} + \mu^* - \mu_{\text{OH}^*} \\ &= -(\mu_{\text{OH}^*} + 1/2 \mu_{\text{H}_2} - \mu_{\text{H}_2\text{O}} - \mu^*) \\ &= -\Delta G_{\text{OH}^*} \end{aligned}$$

For the ORR, the onset potential is calculated by

$$U_{\text{ORR}}^{\text{onset}} = -\max\{\Delta G_1, \Delta G_2, \Delta G_3, \Delta G_4\}$$

### 3. Supporting Figures and Tables

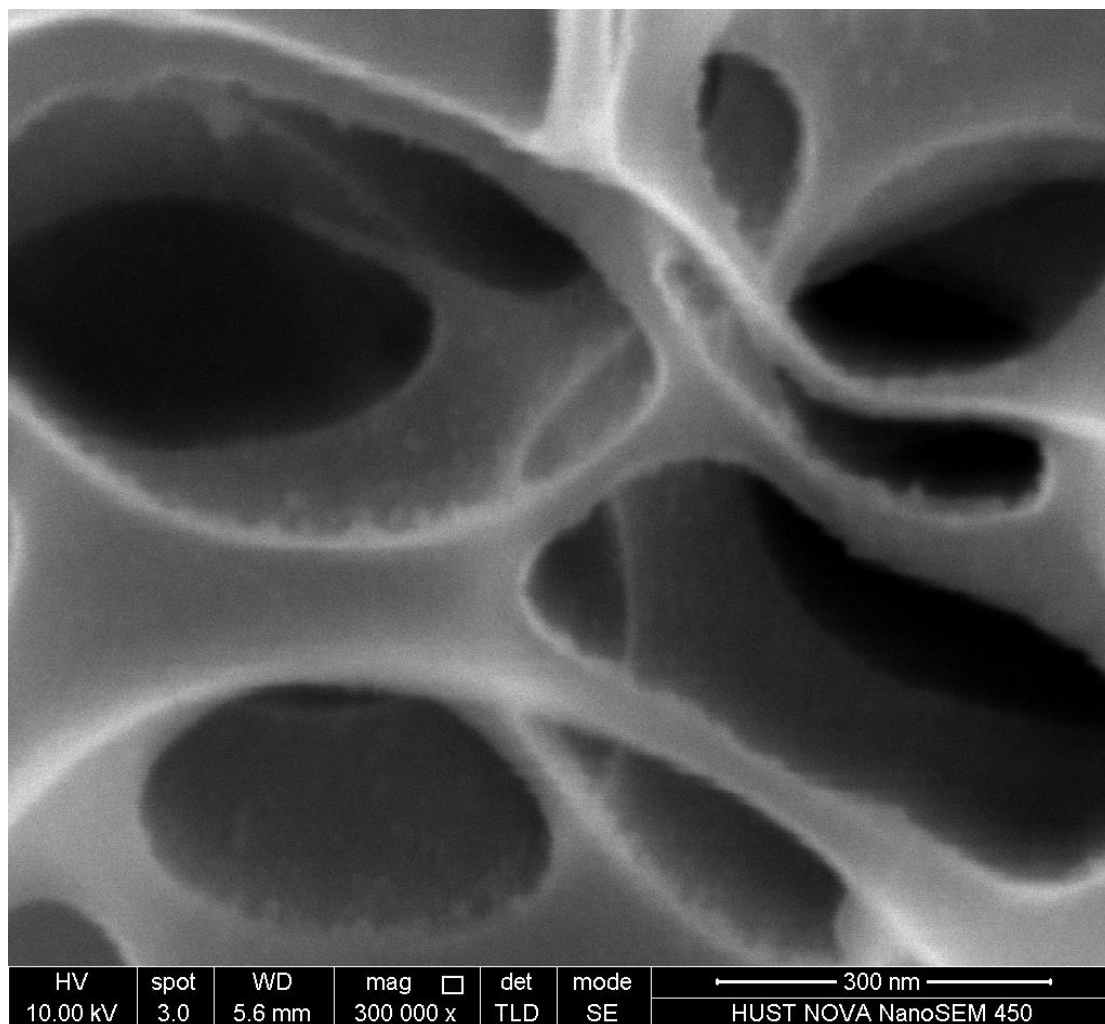

**Fig. S1** Enlarged SEM image of FeNCNs-800.

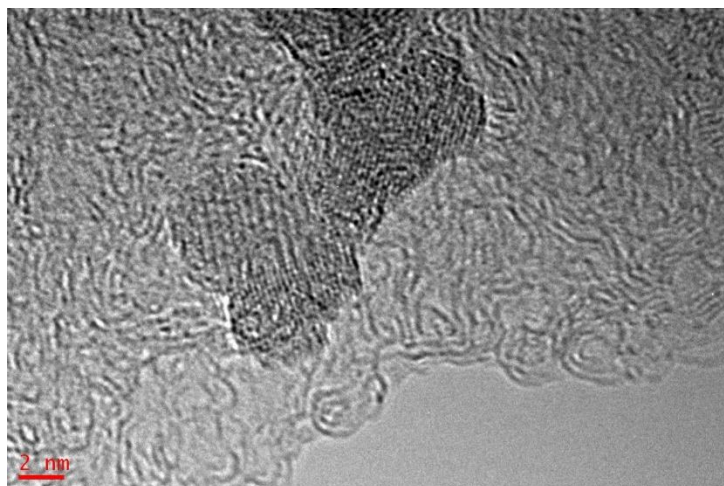

**Fig. S2** HRTEM image of FeNCNs-800.

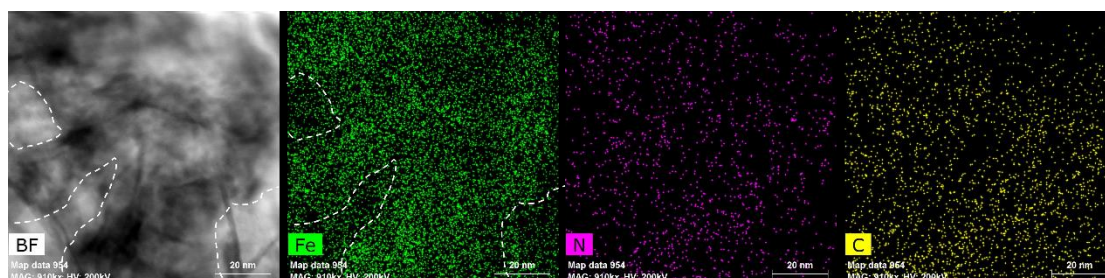

**Fig. S3** EDS elemental mapping images of FeNCNs-800 in larger magnification.

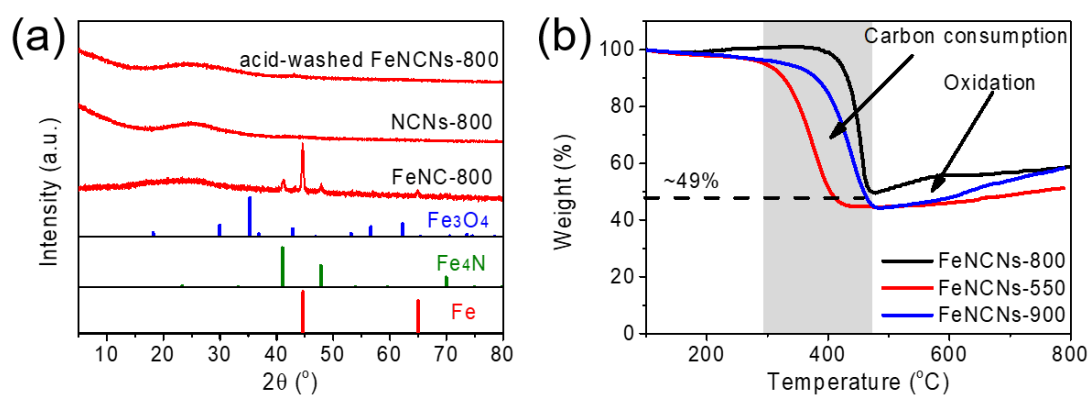

**Fig. S4** (a) XRD patterns of acid-washed FeNCNs-800, NCNs-800 and FeNC-800, (b) TGA results of FeNCNs-550, FeNCNs-800, and FeNCNs-900.

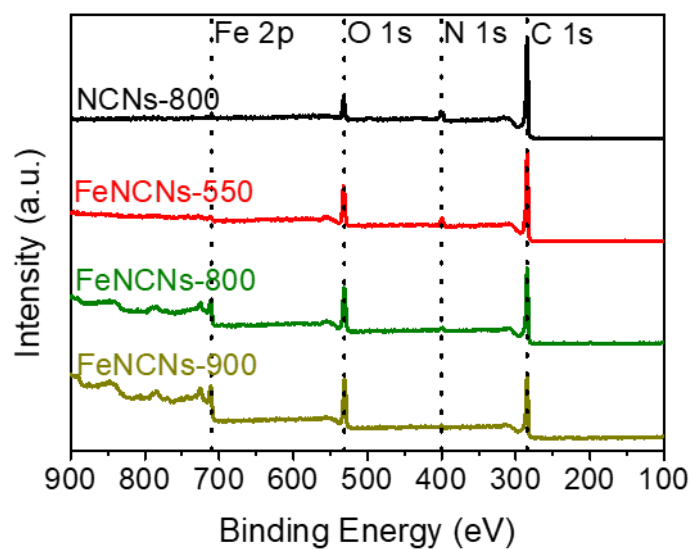

**Fig. S5** XPS survey of NCNs-800, FeNCNs-550, FeNCNs-800, and FeNCNs-900.

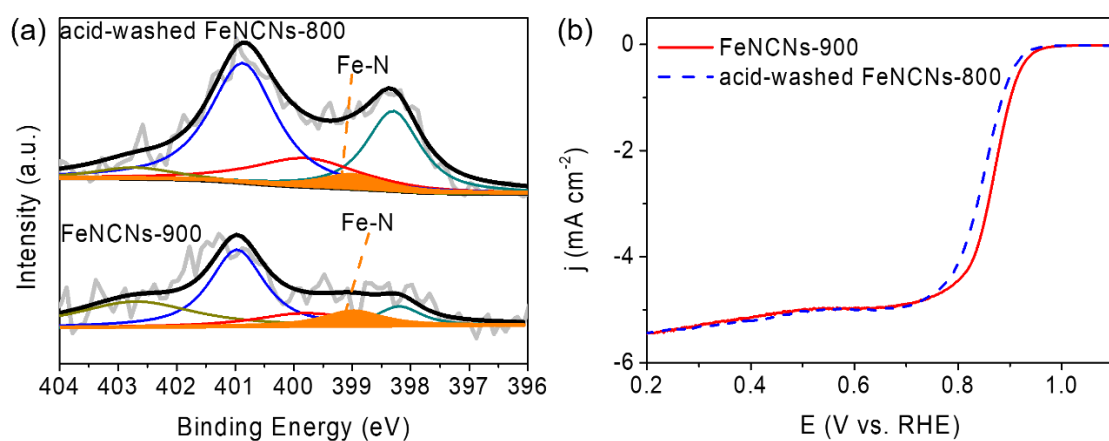

**Fig. S6** (a) XPS N 1s spectra and (b) ORR polarization curves of FeNCNs-900 and acid-washed FeNCNs-800.

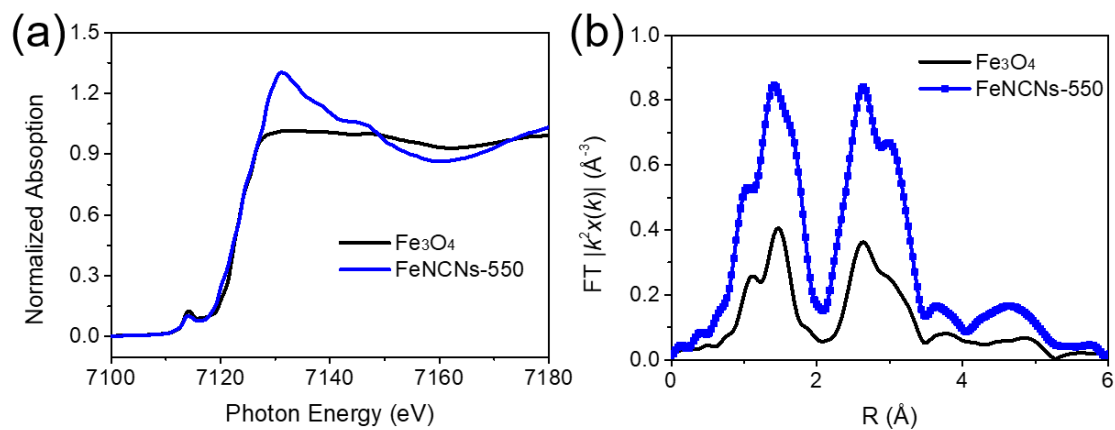



**Fig. S7** (a) Fe *k*-edge XANES spectra of FeNCNs-550, and Fe<sub>3</sub>O<sub>4</sub>, (b) the Fourier transforms of *k*<sup>2</sup>-weighted *x(k)*-function of the EXAFS spectra for FeNCNs-550, and Fe<sub>3</sub>O<sub>4</sub>.

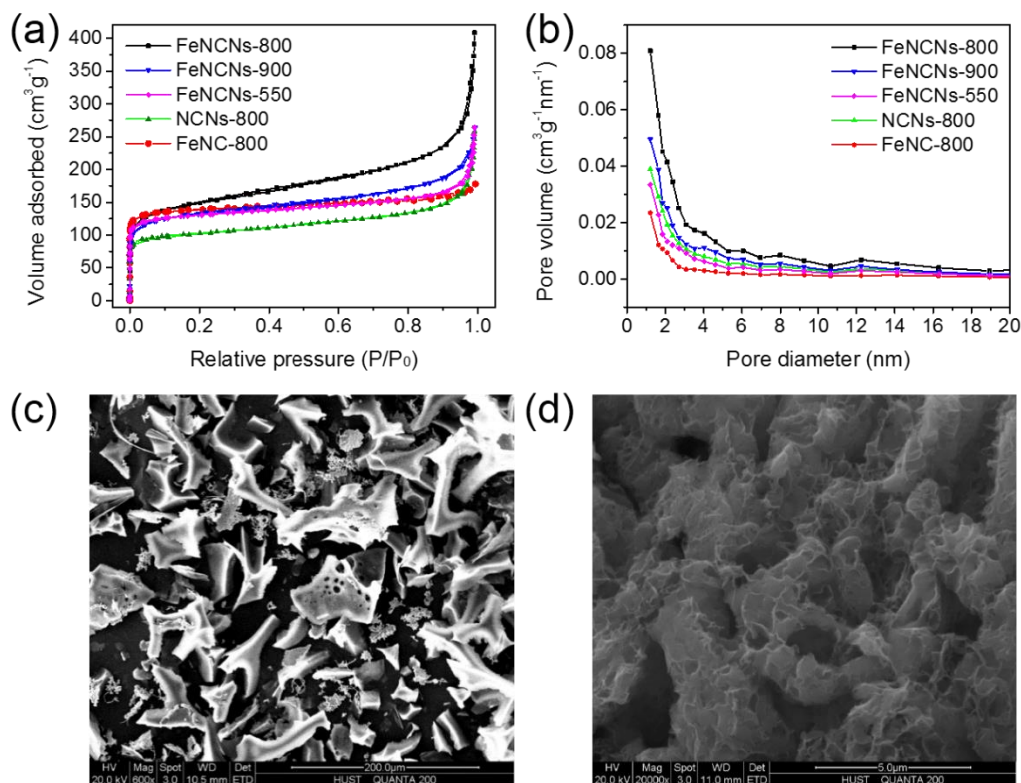

**Fig. S8** (a) The N<sub>2</sub> adsorption-desorption isotherms and (b) corresponding pore size distribution of FeNCNs-800, FeNCNs-900, FeNCNs-550, NCNs-800 and FeNC-800. SEM images of (c) the FeNC-800 and (d) the synthesized product before removing NaCl.

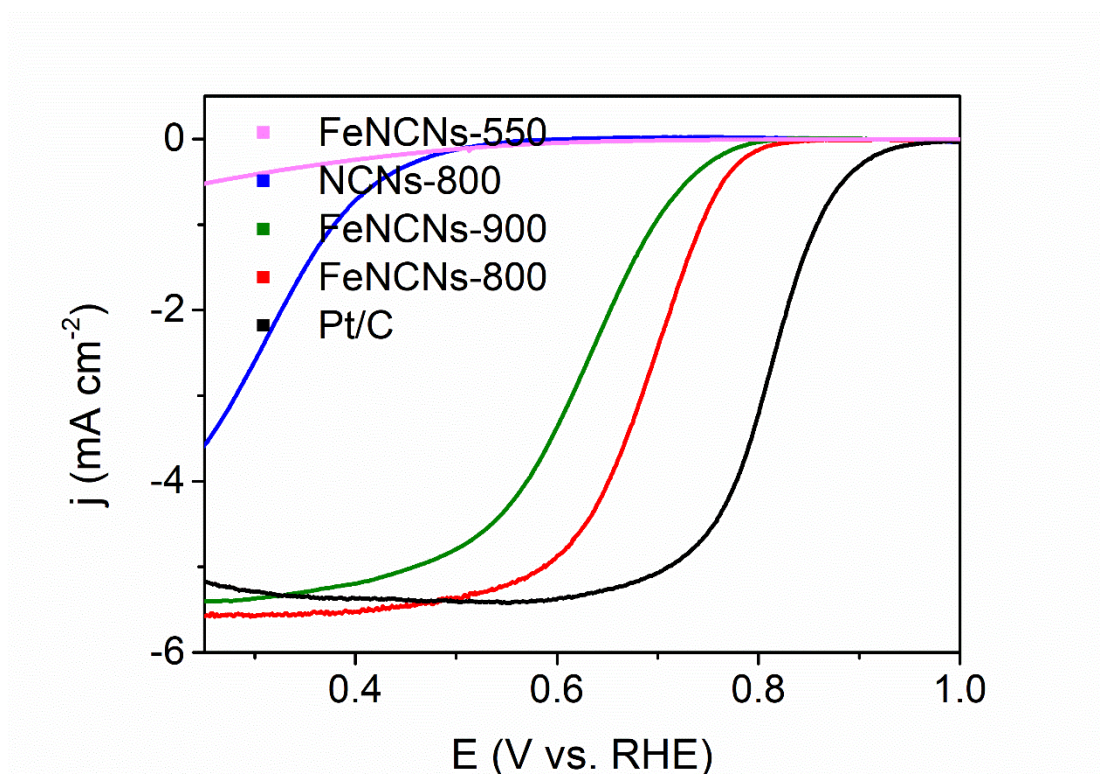

**Fig. S9** LSV curves of FeNCNs-550, NCNs-800, FeNCNs-900, Pt/C and FeNCNs-800 at a rotation rate of 1600 rpm and a scan rate of 10 mV s<sup>-1</sup> in 0.1 M HClO<sub>4</sub> solution.

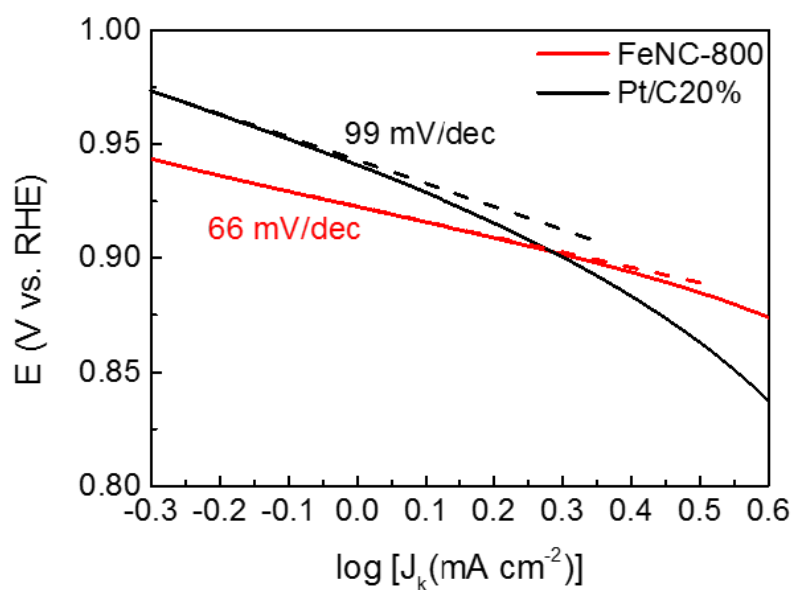

**Fig. S10** The Tafel plots of FeNCNs-800 and Pt/C.

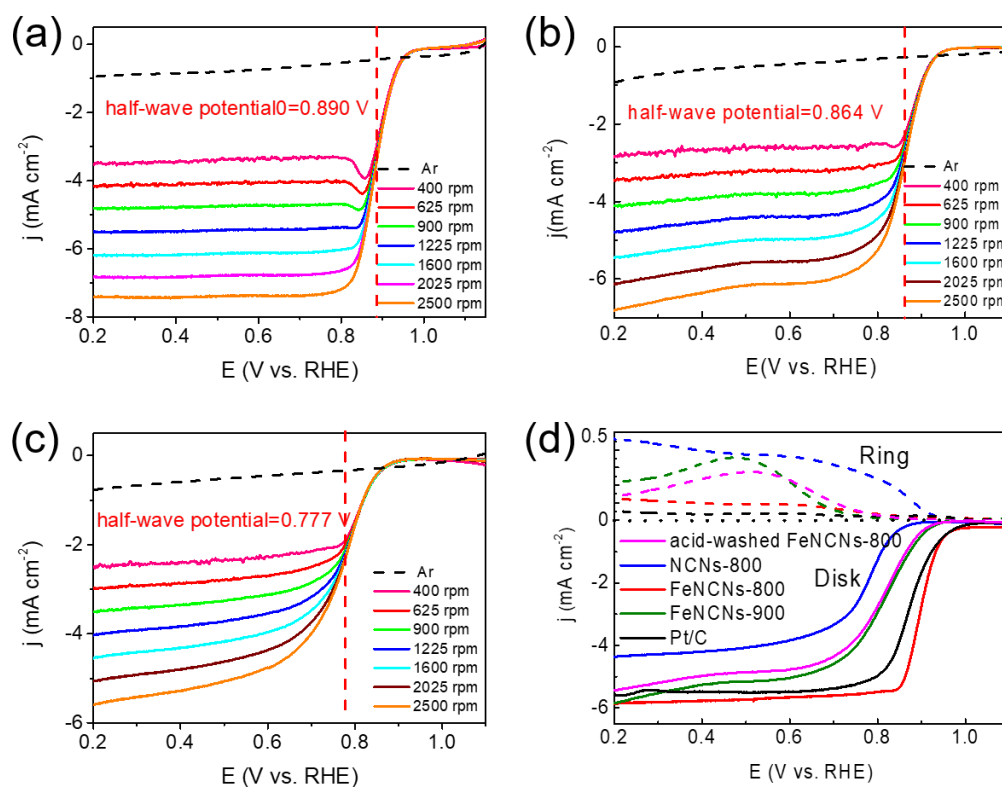

**Fig. S11** The ORR polarization curves of FeNCNs-800 (a), FeNCNs-900 (b) and NCNs-800 (c) at rotation rates ranging from 400-2500 rpm and (d) the RRDE voltammograms of NCNs-800, FeNCNs-800, FeNCNs-900, acid-washed FeNCNs-800 and Pt/C.

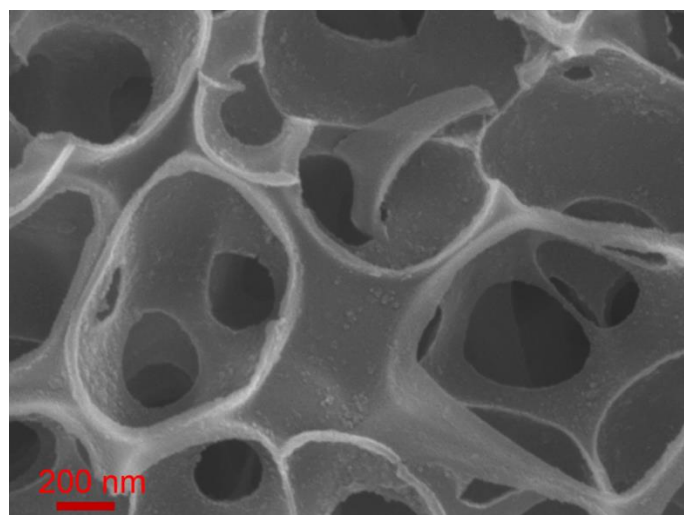

**Fig. S12** The SEM image of FeNCNs-800 after durability test.

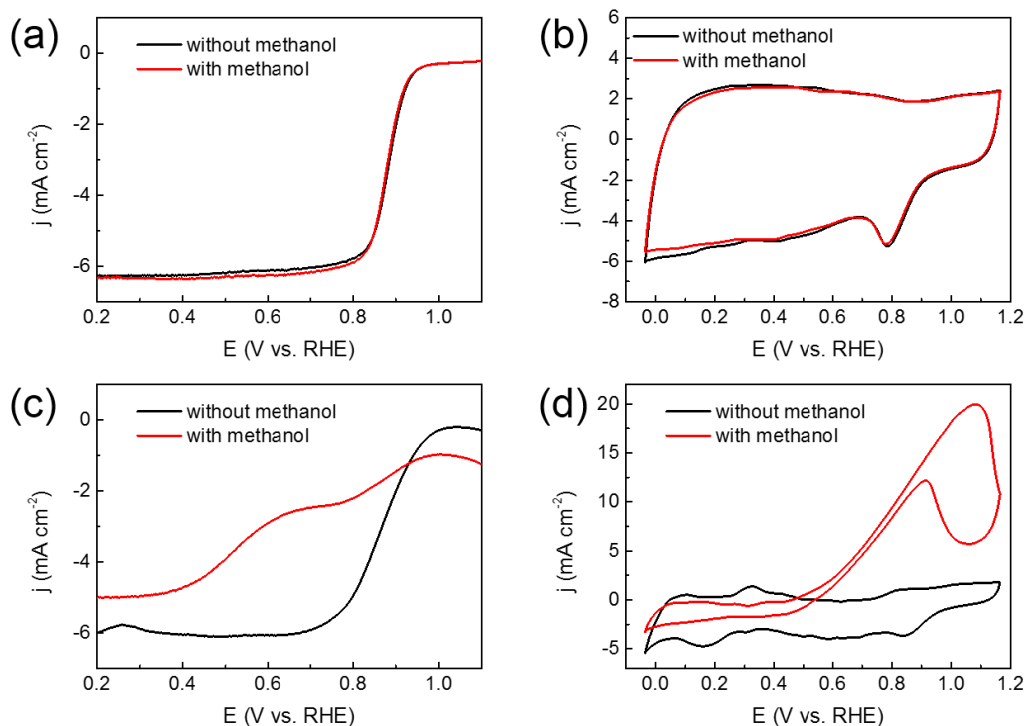

**Fig. S13** ORR polarization curves of FeNCNs-800 (a) and Pt/C (c) in O<sub>2</sub>-saturated 0.1 M KOH with and without the addition of methanol. CVs of FeNCNs-800 (b) and Pt/C (d) in O<sub>2</sub>-saturated 0.1 M KOH with and without the addition of methanol.

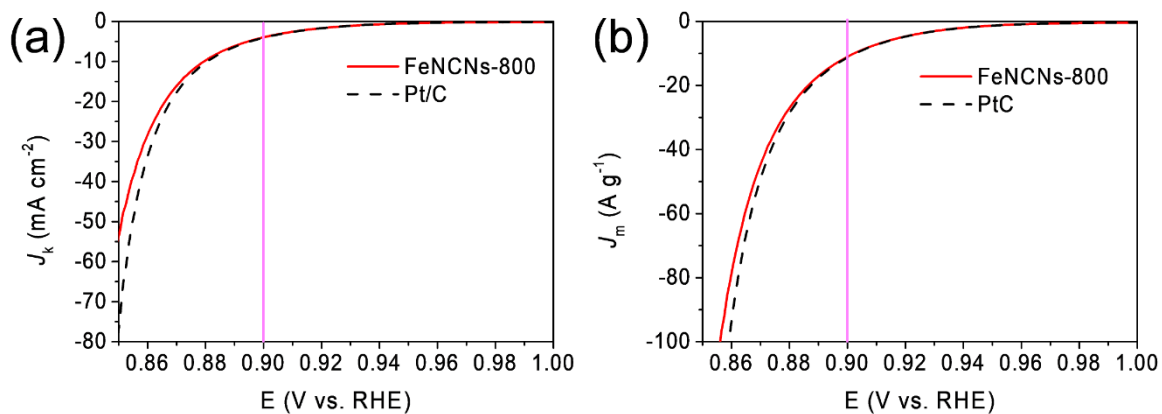

**Fig. S14** kinetic current density of FeNCNs-800 and commercial Pt/C in O<sub>2</sub>-saturated 0.1 M KOH solution at a scan rate of 10 mV s<sup>-1</sup>.

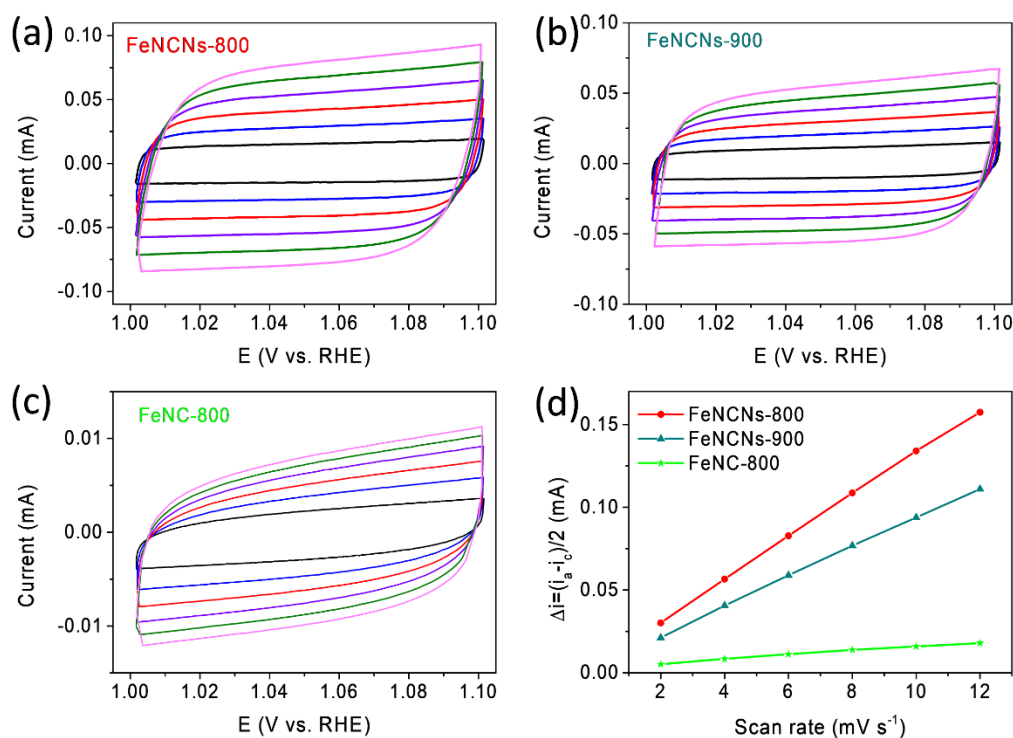

**Fig. S15** (a-c) CV curves of the FeNCNs-800, FeNCNs-900 and FeNC-800 in 0.1 M KOH solution in the region of 1.0-1.1 V for ORR. (d) Average variance between the anodic and cathodic current ( $\Delta i = (i_a - i_c)/2$ ) at 1.05 V against the scan rate for FeNCNs-800, FeNCNs-900 and FeNC-800.

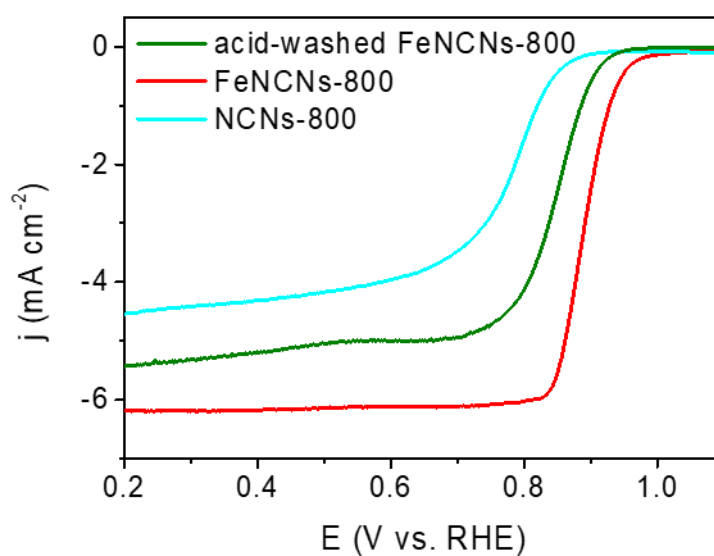

**Fig. S16** ORR polarization curves of NCNs-800, as-prepared and acid-washed +FeNCNs-800 measured in 0.1 M KOH.



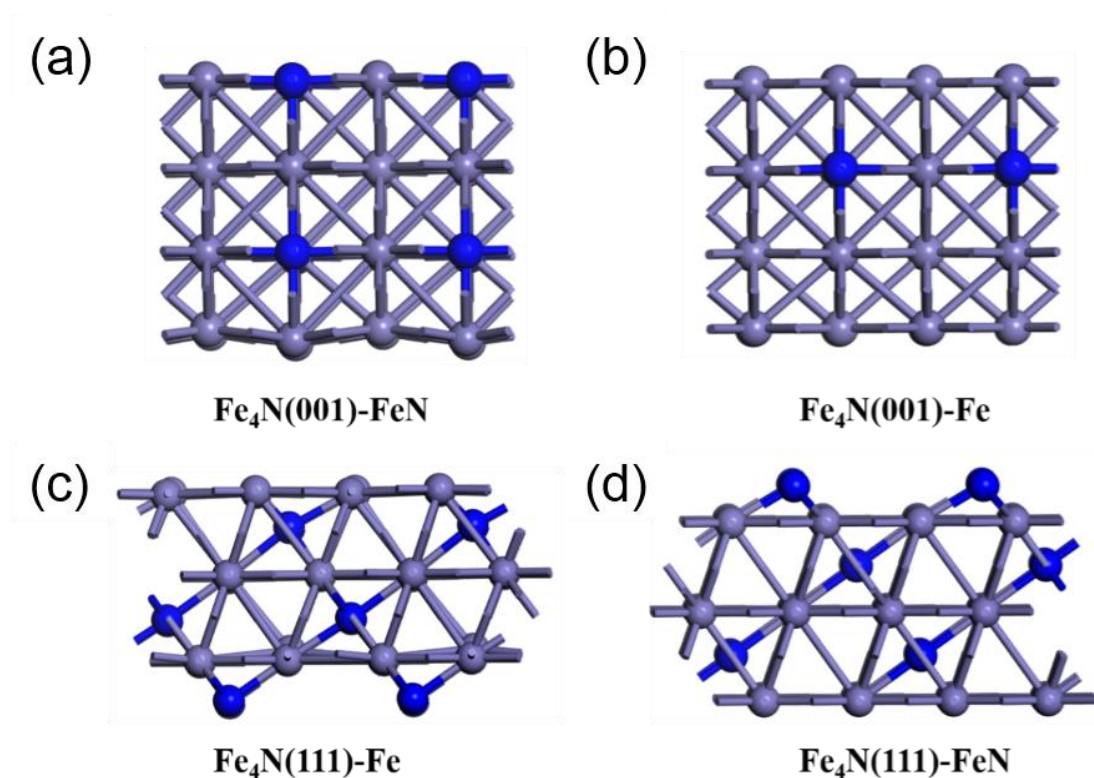

**Fig. S17** Side view of the optimized slab structure of  $\text{Fe}_4\text{N}(001)\text{-FeN}$  (a),  $\text{Fe}_4\text{N}(001)\text{-Fe}$  (b),  $\text{Fe}_4\text{N}(111)\text{-Fe}$  (c) and  $\text{Fe}_4\text{N}(111)\text{-N}$  (d). Blue and purple spheres denote N and Fe atoms, respectively. Here the first notation refers to the slab, while the second notation refers to the exposed top surface of the slab.

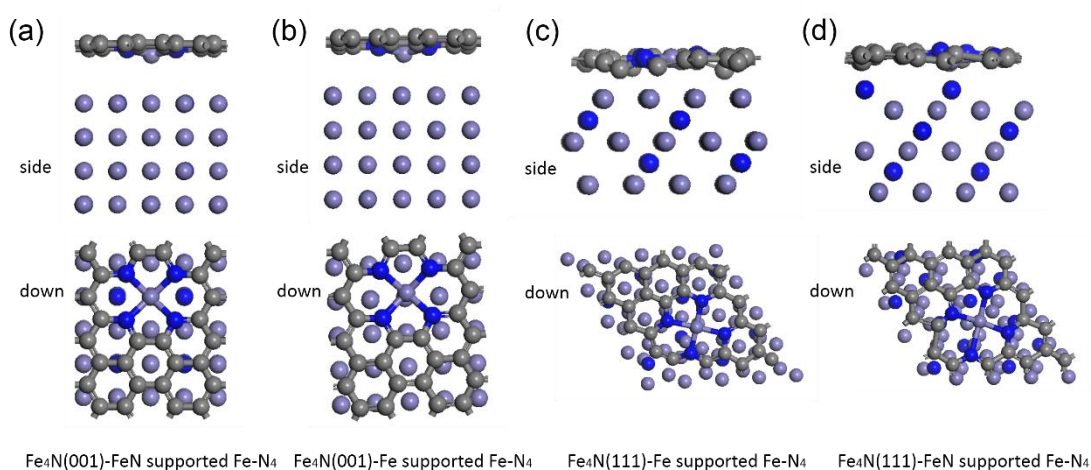

**Fig. S18** The optimized structure of  $\text{Fe}_4\text{N}(001)\text{-N}$  supported  $\text{Fe-N}_4$  moiety (a),  $\text{Fe}_4\text{N}(001)\text{-Fe}$  supported  $\text{Fe-N}_4$  moiety (b),  $\text{Fe}_4\text{N}(111)\text{-Fe}$  supported  $\text{Fe-N}_4$  moiety (c) and  $\text{Fe}_4\text{N}(111)\text{-FeN}$  supported  $\text{Fe-N}_4$  moiety (d). For all model slab structures, the Fe-

N<sub>4</sub> moieties are embedded in a graphene sheet, and they are the active site. (Here, legend “side” denotes side-view and “down” denotes top view). Blue, purple and grey spheres denote N, Fe and C atoms, respectively.

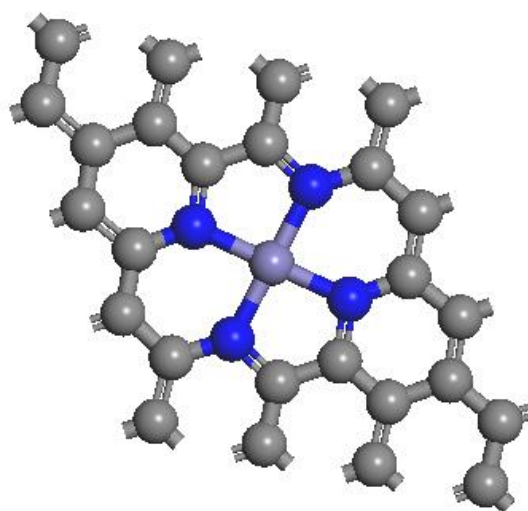

**Fig. S19** Modelling of free Fe-N<sub>4</sub> moieties embedded in a graphene sheet.

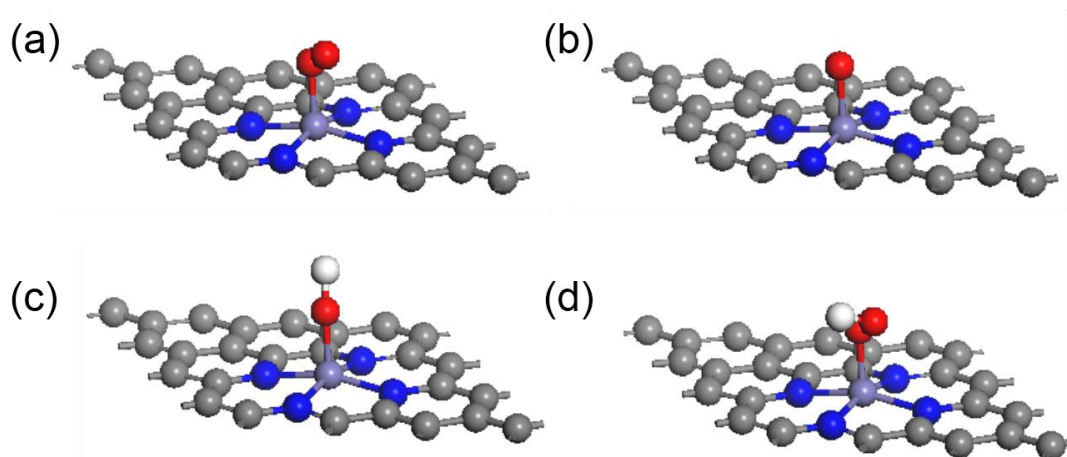

**Fig. S20** O<sub>2</sub> (a), O (b), OH (c) and OOH (d) adsorbed on either a supported- or a free-standing Fe-N<sub>4</sub> moiety that are embedded in a graphene sheet.

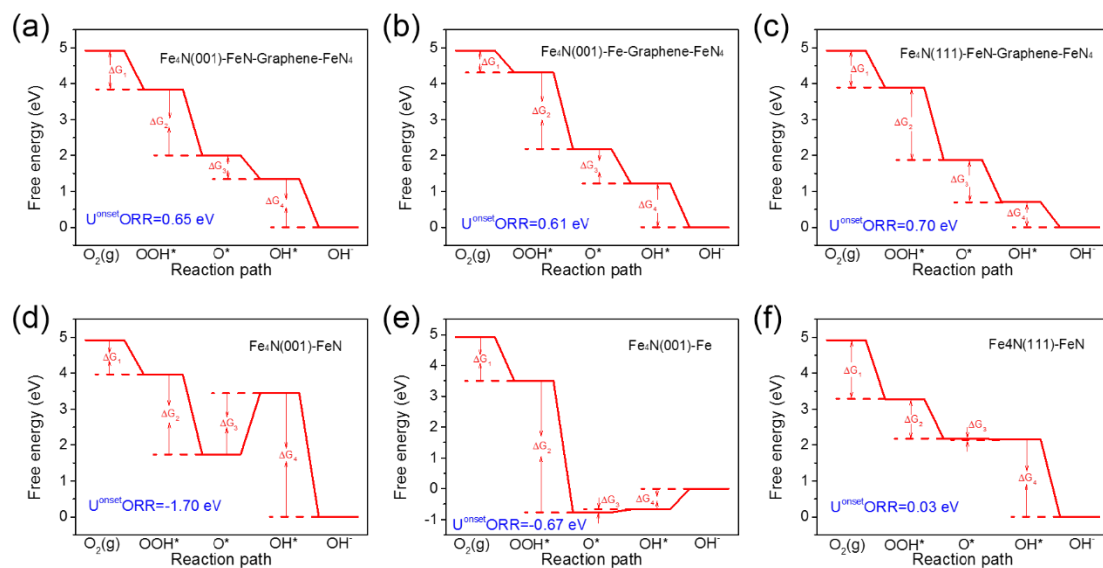

**Fig. S21** (a-f) Free-energy diagram for ORR on different slab structures at zero electrode potential.



**Table S1** Comparison of ORR performance between FeNCNs-800 and other state of the art Fe based catalysts.

| Electrocatalysts                         | E <sub>1/2</sub><br>(V vs. RHE) | Limited current<br>density (mA cm <sup>-2</sup> ) | Loading<br>(mg cm <sup>-2</sup> ) | Ref.                                           |
|------------------------------------------|---------------------------------|---------------------------------------------------|-----------------------------------|------------------------------------------------|
| <b>FeNCNs-800</b>                        | <b>0.890</b>                    | <b>6.18</b>                                       | <b>0.36</b>                       | <b>This work</b>                               |
| S,N-Fe/N/C-CNT                           | 0.85                            | 6.68                                              | 0.6                               | Angew. Chem. Int. Ed.<br>2017, 56(2), 610-614. |
| Fe-N-DSC                                 | 0.834                           | 4.50                                              | 0.1                               | ACS Nano 2018, 12,<br>208-216                  |
| FeBNC                                    | 0.838                           | 5.4                                               | 0.6                               | ACS Energy Lett. 2018,<br>3(1), 252-260        |
| Fe-N-CC                                  | 0.83                            | 4.50                                              | 0.1                               | ACS Nano 2016, 10,<br>5922-5932                |
| FePhen@MOF-<br>ArNH <sub>3</sub>         | 0.86                            | 5.4                                               | 0.6                               | Nat. Commun. 2015, 6,<br>7343.                 |
| (Fe <sub>2</sub> N/MNCNS) <sub>4</sub>   | 0.881                           | 7.18                                              | 0.40                              | Nano Energy, 2016, 24:<br>121-129.             |
| Fe-NMCSs                                 | 0.86                            | 5.3                                               | 0.255                             | Adv. Mater. 2016,<br>28(36), 7948-7955.        |
| GL-Fe/Fe <sub>5</sub> C <sub>2</sub> /NG | 0.86                            | 5.5                                               | 0.15                              | Adv. Energy Mater.<br>2018, 8, 1702476         |
| Fe <sub>3</sub> C/NG-800                 | 0.86                            | 5.9                                               | 0.4                               | Adv. Mater. 2015, 27,<br>2521-2527             |
| CNT-PC                                   | 0.88                            | 6.1                                               | 0.82                              | J. Am. Chem. Soc. 2016,<br>138, 15046-15056    |

**Table S2** The actual contents of Fe in the FeNCNs-*T*s samples measured by ICP-MS.

| Samples    | Fe (wt. %) |
|------------|------------|
| FeNCNs-550 | 42.5       |
| FeNCNs-800 | 45.9       |
| FeNCNs-900 | 52.5       |

**Table S3** Mössbauer parameters of FeNCNs-800 at room temperature

| Sample     | Component         | IS(mm/s) | Relative content (%) |
|------------|-------------------|----------|----------------------|
| FeNCNs-800 | Fe <sub>4</sub> N | 0.244    | 37.3                 |
|            | α-Fe              | 0.018    | 46.1                 |
|            | Fe-N <sub>4</sub> | 0.322    | 16.6                 |

**Table S4** Summary of surface properties of catalysts obtained from BET and XPS

| Samples    | S <sub>BET</sub><br>(m <sup>2</sup> g <sup>-1</sup> ) | Total pore<br>volume<br>(cm <sup>3</sup> g <sup>-1</sup> ) | C (at.%) | N (at.%) | O (at.%) | Fe (at.%) | Fe-N <sub>x</sub> (at.%) |
|------------|-------------------------------------------------------|------------------------------------------------------------|----------|----------|----------|-----------|--------------------------|
| FeNCNs-800 | 532.78                                                | 0.6223                                                     | 69.28    | 3.35     | 20.44    | 6.93      | 0.44                     |
| FeNCNs-900 | 493.81                                                | 0.3968                                                     | 65.13    | 1.71     | 23.71    | 9.45      | 0.15                     |
| FeNCNs-550 | 415.01                                                | 0.3933                                                     | 77.50    | 6.31     | 15.13    | 1.07      | --                       |
| NCNs-800   | 386.43                                                | 0.3900                                                     | 84.39    | 7.79     | 7.82     | --        | --                       |
| FeNC-800   | 339.98                                                | 0.2723                                                     | --       | --       | --       | --        | --                       |

**Table S5** Adsorption free energies of OH, O, and OOH (eV) on different systems

| systems                                   | O     | OH    | OOH  |
|-------------------------------------------|-------|-------|------|
| Fe4N(001)-Fe supported Fe-N <sub>4</sub>  | 2.18  | 1.22  | 4.31 |
| Fe4N(001)-FeN supported Fe-N <sub>4</sub> | 2.00  | 1.35  | 3.84 |
| Fe4N(111)-Fe supported Fe-N <sub>4</sub>  | 2.03  | 0.84  | 3.89 |
| Fe4N(111)-FeN supported Fe-N <sub>4</sub> | 1.88  | 0.70  | 3.89 |
| Fe4N(111)-Fe                              | -1.12 | -0.63 | 3.21 |
| Fe4N(111)-N                               | 2.18  | 2.15  | 3.28 |
| Fe4N(001)-Fe                              | -0.77 | -0.67 | 3.5  |
| Fe4N(001)-FeN                             | 1.74  | 3.44  | 3.96 |
| Fe-N <sub>4</sub>                         | 1.26  | 0.57  | 3.44 |

**Table S6** Values used for the entropy and zero-point energy corrections in determining the free energy of reactants, products, and intermediate species adsorbed on catalysts. For the adsorbates, the ZPE values are averaged over all single atom catalyst systems since they have rather close value.

| Species             | T×S (eV) (298K) | ZPE (eV) |
|---------------------|-----------------|----------|
| O*                  | 0               | 0.07     |
| OH*                 | 0               | 0.33     |
| OOH*                | 0               | 0.43     |
| H <sub>2</sub> (g)  | 0.41            | 0.27     |
| H <sub>2</sub> O(g) | 0.58            | 0.57     |

**Table S7** Reaction free energy (eV vs RHE) of elementary step for ORR at  $U_{\text{RHE}} = 0\text{V}$  on different systems.

| systems                                                | $\Delta G_1$ | $\Delta G_2$ | $\Delta G_3$ | $\Delta G_4$ | $U_{\text{onsetORR}}$ |
|--------------------------------------------------------|--------------|--------------|--------------|--------------|-----------------------|
| Fe <sub>4</sub> N(001)-Fe supported Fe-N <sub>4</sub>  | -0.61        | -2.13        | -0.96        | -1.22        | 0.61                  |
| Fe <sub>4</sub> N(001)-FeN supported Fe-N <sub>4</sub> | -1.08        | -1.85        | -0.65        | -1.35        | 0.65                  |
| Fe <sub>4</sub> N(111)-Fe supported Fe-N <sub>4</sub>  | -1.03        | -1.86        | -1.19        | -0.84        | 0.84                  |
| Fe <sub>4</sub> N(111)-FeN supported Fe-N <sub>4</sub> | -1.03        | -2.02        | -1.18        | -0.70        | 0.70                  |
| Fe <sub>4</sub> N(111)-Fe                              | -1.71        | -4.33        | 0.48         | 0.63         | -0.63                 |
| Fe <sub>4</sub> N(111)-FeN                             | -1.64        | -1.10        | -0.03        | -2.15        | 0.03                  |
| Fe <sub>4</sub> N(001)-Fe                              | -1.42        | -4.27        | 0.10         | 0.67         | -0.67                 |
| Fe <sub>4</sub> N(001)-FeN                             | -0.96        | -2.23        | 1.70         | -3.44        | -1.70                 |
| Fe-N <sub>4</sub>                                      | -1.48        | -2.18        | -0.69        | -0.57        | 0.57                  |
| Ideal ORR catalyst                                     | -1.23        | -1.23        | -1.23        | -1.23        | 1.23                  |

#### 4. Supporting References

- 1 Z. Wen, S. Ci, F. Zhang, X. Feng, S. Cui, S. Mao, S. Luo, Z. He and J. Chen, *Adv. Mater.*, 2012, **24**, 1398-1398.
- 2 J. K. Nørskov, J. Rossmeisl, A. Logadottir, L. Lindqvist, J. R. Kitchin, T. Bligaard and H. Jonsson, *The J. Phys. Chem. B*, 2004, **108**, 17886-17892.
- 3 S. K. Desai and M. Neurock, *Phys. Rev. B*, 2003, **68**, 1071-1086.
- 4 P. Atkins and J. d. Paula, *Atkins' physical chemistry*, Oxford University Press, 2006
